# Supplementary material
Source: publisher figshare collection journal article supplement (https://acs.figshare.com/ndownloader/files/12333272)
Supplement: Supplementary file 1 [file 12333272]

Supporting Information for

# Hydrophobic Polyampholytes and Nonfreezing Cold Temperature Stimulate Internalization of Au Nanoparticles to Zwitterionic Liposomes

*Sana Ahmed, Kazuaki Matsumura\* and Tsutomu Hamada\**

\*Corresponding authors

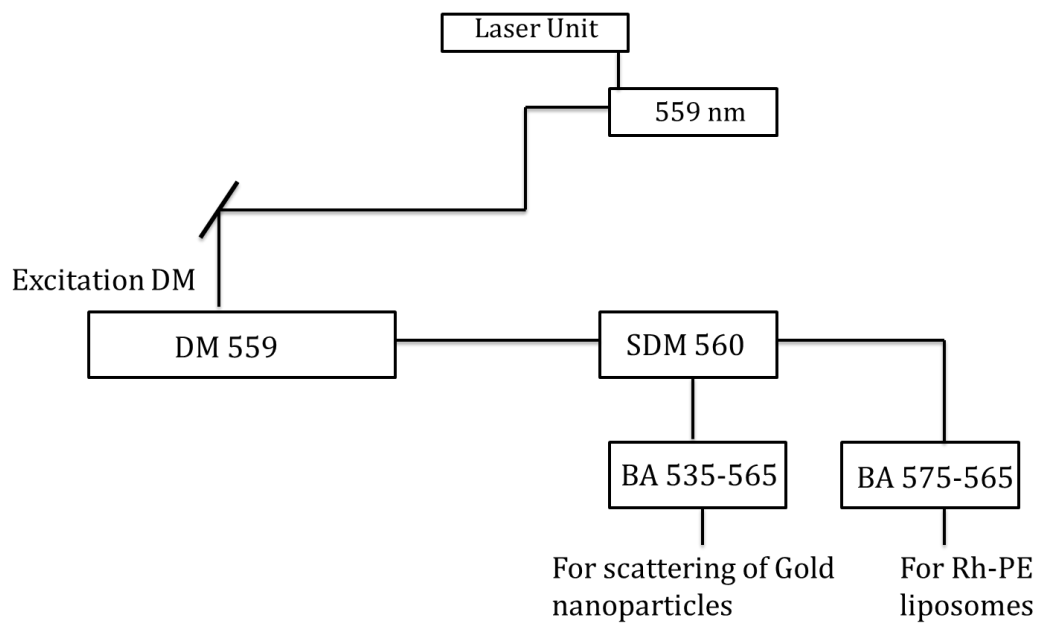

**Figure S1** Schematic description of the setting of confocal microscopy for observation of the scattering of AuNPs along with Rh-PE liposomes

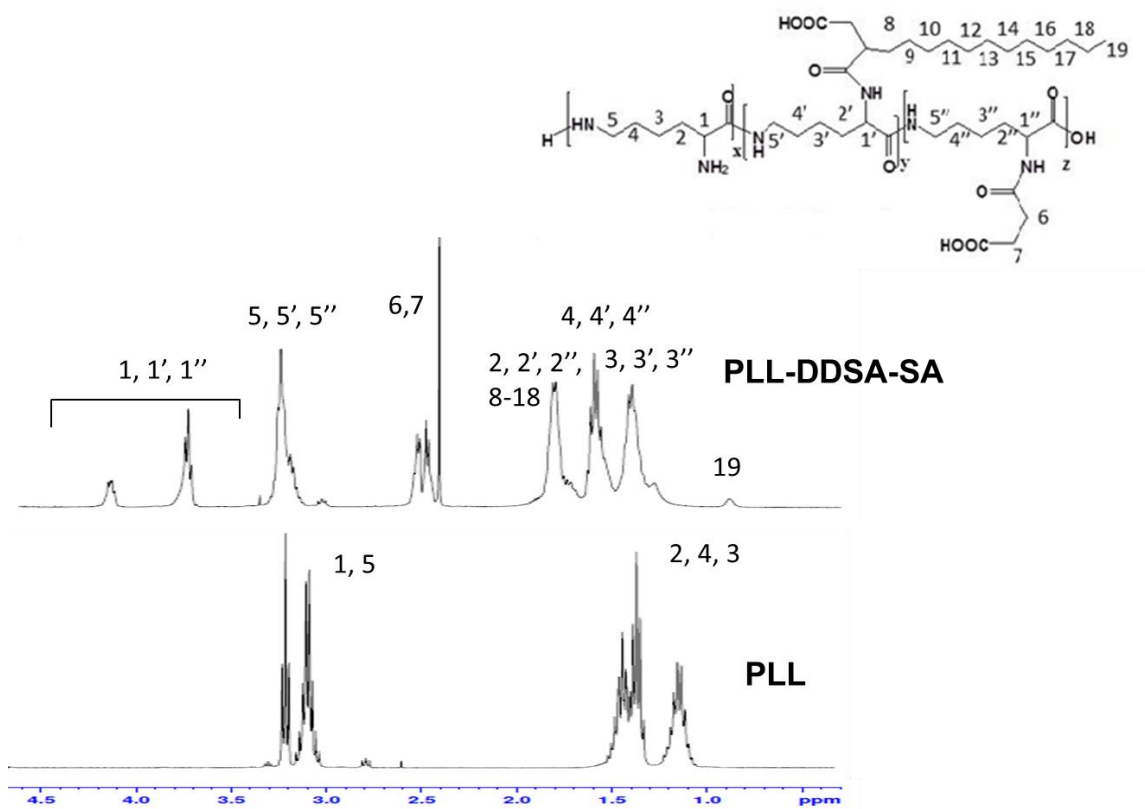

**Figure S2** <sup>1</sup>H NMR of native PLL and PLL-DDSA-SA

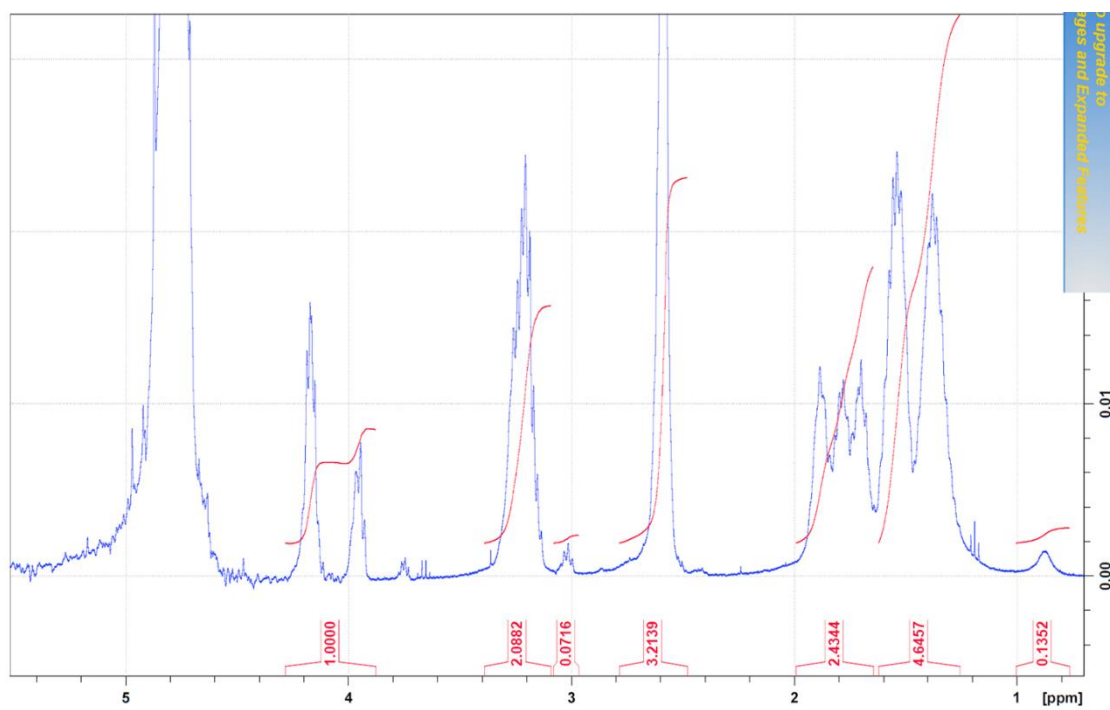

**Figure S3** Integration of  $^1\text{H}$  NMR of PLL-DDSA(5)-SA(65)

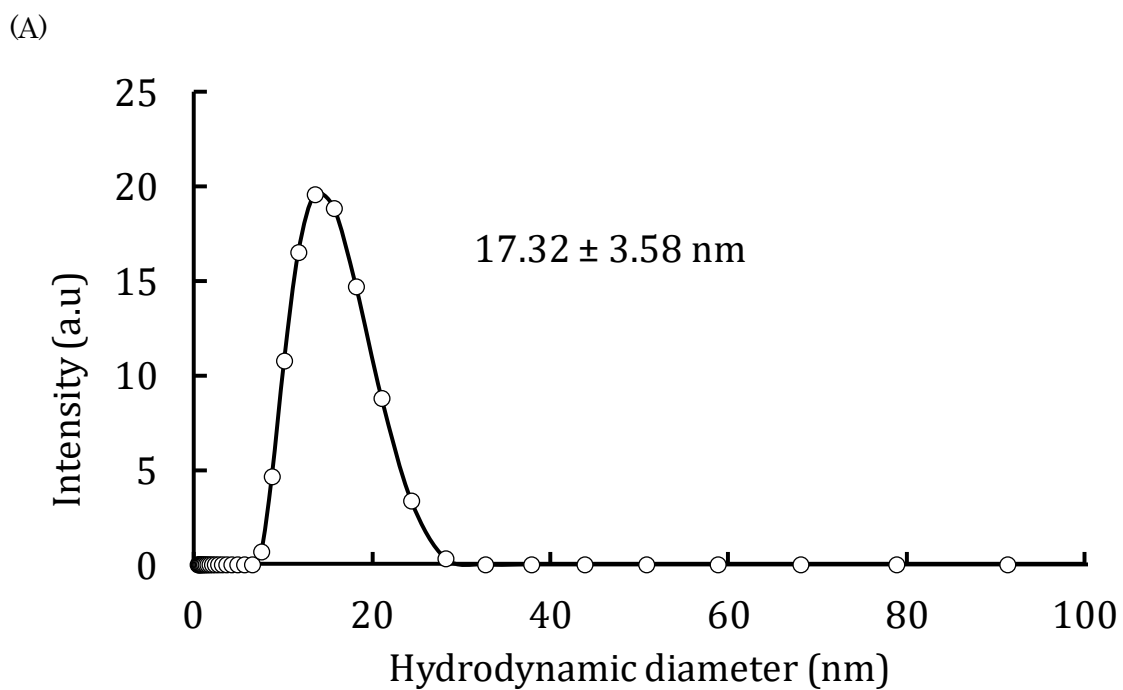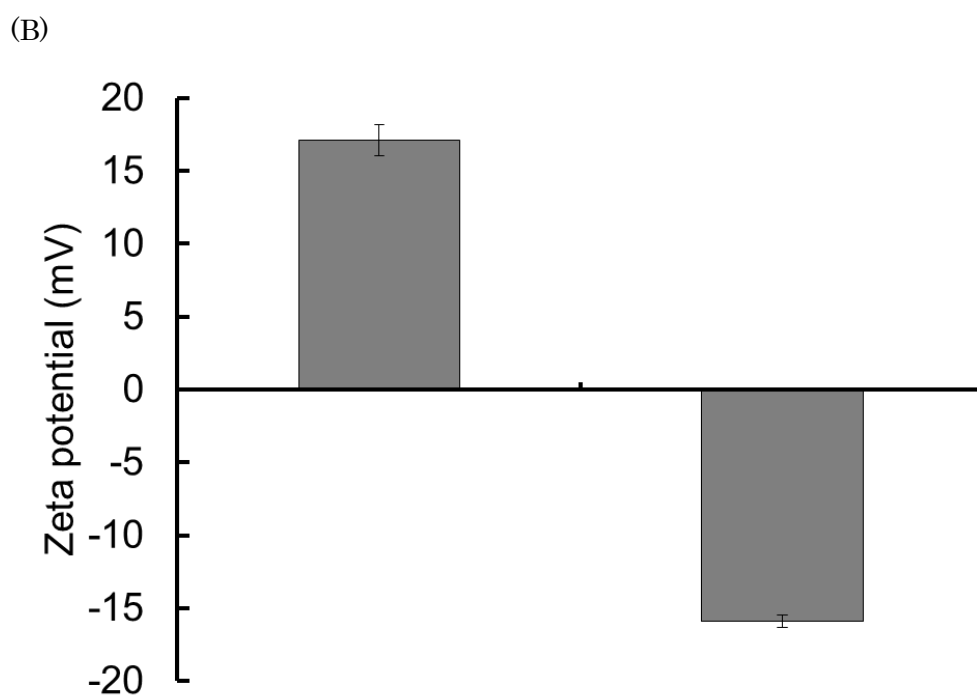

**Figure S4** Characterization by Dynamic light scattering at 25 °C and pH 7.4 (A) Hydrodynamic diameter of PLL-DDSA-SA (B) Zeta potential of PLL and PLL-DDSA-SA.
